# Physical Activity and Metabolic Risk in Individuals With a Family History of Type 2 Diabetes

ULF EKElund, PhD  
SIMON J. GRIFFIN, DM

NICHOLAS J. WAREHAM, MD, PhD  
ON BEHALF OF THE PROACTIVE RESEARCH  
GROUP

**OBJECTIVE** — We sought to examine the independent associations between different dimensions of physical activity with intermediary and clustered metabolic risk factors in overweight individuals with an increased risk of type 2 diabetes to inform future preventive action.

**RESEARCH DESIGN AND METHODS** — We measured total body movement and five other subcomponents of physical activity by accelerometry in 258 adults (aged 30–50 years) with a family history of type 2 diabetes. We estimated aerobic fitness from an incremental treadmill exercise test. We measured body composition by bioimpedance and waist circumference, blood pressure, fasting triglycerides, HDL cholesterol, glucose, and insulin with standard methods. We constructed a standardized continuously distributed variable for clustered risk.

**RESULTS** — Total body movement ( $\text{counts} \cdot \text{day}^{-1}$ ) was significantly and independently associated with three of six risk factors (fasting triglycerides, insulin, and HDL) and with clustered metabolic risk ( $P = 0.004$ ) after adjustment for age, sex, and obesity. Time spent at moderate- and vigorous-intensity physical activity (MPVA) was independently associated with clustered metabolic risk ( $P = 0.03$ ). Five- and 10-min bouts of MVPA, time spent sedentary, time spent at light-intensity activity, and aerobic fitness were not significantly related with clustered risk after adjustment for confounding factors.

**CONCLUSIONS** — Total body movement is associated with intermediary phenotypic risk factors for cardiovascular disease and metabolic disease and with clustered metabolic risk independent of aerobic fitness and obesity. Increasing the total amount of physical activity in sedentary and overweight individuals may have beneficial effects on metabolic risk factors.

*Diabetes Care* 30:337–342, 2007

The metabolic syndrome is loosely defined as a cluster of cardiovascular disease (CVD) risk factors, including disturbed insulin and glucose metabolism, hypertension, abdominal obesity, and dyslipidemia. This syndrome predicts the development of type 2 diabetes, CVD, and all-cause mortality (1,2). Low levels of physical activity are believed to be an important determinant of this cluster of metabolic risk factors. Given the global increase in the prevalence of obesity, type 2 diabetes, and the metabolic syndrome (3–6), there is a need to further

understand how intermediary phenotypic metabolic risk factors are influenced by potentially modifiable lifestyle behaviors, such as physical activity.

Total body movement (i.e., the total amount of physical activity) and patterns of activity (i.e., time spent sedentary and at various intensity levels and bouts of sustained activity) are separate dimensions of activity, which may be associated with intermediary phenotypes of metabolic risk in different ways. However, these subdimensions of activity are inherently difficult to measure precisely in ep-

idemiological studies because of their complex and latent nature (7). Previous researchers have primarily relied on self-reported physical activity when examining associations between physical activity and clustered metabolic risk and its subcomponents (8–14). We have recently suggested that objectively measured physical activity energy expenditure (PAEE) is independently associated with clustered metabolic risk in a healthy population (15) and that PAEE predicts progression to the metabolic syndrome independent of aerobic fitness and body fatness (16). However, it was unclear from these studies which, if any, of the subdimensions of physical activity exert a greater influence on individual and clustered metabolic risk factors. Given that strategies to promote distinct types of physical activity will differ, it is important to understand the dimensions of activity most strongly associated with a particular outcome when one is designing preventive interventions for high-risk groups. Targeting the wrong dimensions of physical activity may limit the potential benefits predicted by observational studies.

The purpose of the present study was to examine the magnitude and directions of associations between total body movement; accumulated time spent sedentary, at light-intensity activity, and at moderate- and vigorous-intensity physical activity (MVPA); and bouts of MVPA with established metabolic risk factors to inform future preventive action. This cross-sectional study was conducted in healthy men and women at high risk of developing type 2 diabetes because of a family history of the disease.

## RESEARCH DESIGN AND METHODS

Individuals in the study population were all participants in the ProActive Study, a randomized, controlled trial examining the efficacy of a family-based intervention to increase physical activity among individuals defined as high-risk through having a parental history of type 2 diabetes. The selection procedures, screening, recruitment, inclusion criteria, randomization, design, and methods have been described

From the Medical Research Council Epidemiology Unit, Cambridge, U.K.

Address correspondence and reprint requests to Ulf Ekelund, MRC Epidemiology Unit, Elsie Widdowson Laboratory, Fulbourn Road, CB1 9NL, Cambridge, U.K. E-mail: ulf.ekelund@mrc-epid.cam.ac.uk.

Received for publication 8 September 2006 and accepted in revised form 31 October 2006.

**Abbreviations:** CVD, cardiovascular disease; FFM, fat-free mass; MVPA, moderate- and vigorous-intensity physical activity; PAEE, physical activity energy expenditure.

A table elsewhere in this issue shows conventional and Système International (SI) units and conversion factors for many substances.

DOI: 10.2337/dc06-1883

© 2007 by the American Diabetes Association.

The costs of publication of this article were defrayed in part by the payment of page charges. This article must therefore be hereby marked "advertisement" in accordance with 18 U.S.C. Section 1734 solely to indicate this fact.

previously (17). Briefly, potential participants were identified via diabetes registers and medical records of family history in 20 general practices in East Anglia. To exclude very active individuals, participants completed a screening activity questionnaire describing occupational and leisure activity, based on published questionnaires (18,19).

Of the 465 eligible individuals, 399 were recruited for baseline measurements. Complete data on aerobic fitness, anthropometrics, and biochemistry at baseline were available for 365 individuals. In a subsample ( $n = 258$ ), patterns of physical activity were also measured objectively by means of accelerometry. This constitutes the sample for the present analyses. All data presented in this report are cross-sectional data from the baseline data collection conducted before randomization. All participants provided written informed consent, and ethical permission for the study was granted by the Eastern England Multicenter Research Ethics Committee.

### Anthropometric and metabolic tests

Height and weight were measured using a rigid stadiometer and calibrated scales with the subjects wearing light clothing. Waist circumference was measured in duplicate using a metal tape. Resistance (ohms) was assessed using a standard bioimpedance technique (Bodystat, Isle of Man, U.K.). This method has previously been shown to be valid (20) and reliable (21). Total body water and fat-free mass (FFM) were calculated using the impedance index (square of height divided by resistance), and body weight and resistance were calculated according to published equations (22). Fat mass was calculated as body weight minus FFM. Percent body fat was calculated as fat mass/body weight  $\times 100$ .

Blood pressure was measured with subjects in the seated position using an Accutorr automatic sphygmomanometer (Datascope, Cambridge, U.K.). Systolic and diastolic blood pressures were measured in triplicate at minute intervals, and the mean of these measurements was used in analyses.

Fasting blood samples were taken, centrifuged and aliquoted on site, and immediately placed on ice and transferred to the laboratory where they were stored at  $-70^{\circ}\text{C}$  within 4 h. Blood samples were measured in the routine National Health Service laboratory at Addenbrooke's Hospital in Cambridge. Plasma glucose was

measured using the hexokinase method, and plasma triglycerides and HDL cholesterol were measured with standard enzymatic methods. Plasma-specific insulin was determined by a 1235 AutoDELFIA automatic immunoassay system using a two-step time-resolved fluorometric assay (DAKO, Ely, Cambridgeshire, U.K.). Cross-reactivity with intact proinsulin is  $<0.5\%$  at 2,736 pmol/l, with 32–33 split proinsulin is 1% at 2,800 pmol/l, and with C-peptide is  $<0.1\%$  at 5,280 pmol/l. Typical interassay coefficients of variance are 3.1% at 29.0 pmol/l, 2.1% at 79.4 pmol/l, 1.9% at 277 pmol/l, and 2.0% at 705 pmol/l, respectively ( $n = 174$  in each case).

### Clustered metabolic risk

We constructed a standardized continuously distributed variable ( $zMS$ ) for clustered metabolic risk, which we have described in detail previously (15,16). This variable was derived by standardizing and then summing the following continuously distributed indexes of obesity (waist circumference), hypertension ( $[\text{systolic blood pressure} + \text{diastolic blood pressure}]/2$ ), hyperglycemia (fasting plasma glucose), insulin resistance (fasting insulin), inverted fasting HDL cholesterol, and hypertriglyceridemia to create a Z score. The purpose of using a continuously distributed variable was to maximize statistical power (23).

### Assessment of aerobic fitness and physical activity

Aerobic fitness ( $VO_{2\text{max}}$ ) was predicted as oxygen uptake at maximal heart rate (220 minus age) by extrapolation of the regression line established during the individual calibration for the relationship between oxygen consumption and heart rate during a submaximal graded treadmill exercise test. Oxygen uptake and  $CO_2$  production were continuously measured by indirect calorimetry throughout the test (Vista XT metabolic system; Vacumed, Ventura, CA). Participants breathed through a face mask (Hans Rudolph, Kansas City, MO), and expired air was measured with a turbine flowmeter, carbon dioxide concentration with an infrared sensor, and oxygen concentration with a fast differential paramagnetic sensor. Gas analyzers were calibrated with gases of known composition, and the turbine flow meter was calibrated with a 3-l syringe before each measurement.

Data on free-living physical activity was assessed with an MTI ActiGraph (for-

merly known as the CSA activity monitor) model WAM 7164 (Manufacturing Technology, Fort Walton Beach, FL) accelerometer over 4 consecutive days. The participants wore the accelerometer in an elastic waistband at the lower back during daytime, except while bathing and during other aquatic activities. Participants who did not manage to record at least 500 min/day of activity for at least 3 days were excluded from further analyses ( $n = 7$ ). The outcome variables were total body movement ( $\text{counts} \cdot \text{day}^{-1}$ ), which is an indicator of the total volume of physical activity, and time ( $\text{minutes} \cdot \text{day}^{-1}$ ) spent at different activity intensity categories averaged per day over the measurement period. These were calculated to determine which subcomponents of activity, if any, are associated with individual and clustered metabolic risk and to establish whether these associations were related in a dose-response manner. Intensity thresholds for moderate (1,952–5,724  $\text{counts} \cdot \text{min}^{-1}$ ) and vigorous intensity activity ( $>5,725 \text{ counts} \cdot \text{min}^{-1}$ ) were defined according to Freedson et al. (24). Because  $>60\%$  of participants did not accumulate any time in vigorous intensity physical activity, we constructed a single variable by combining accumulated time in MVPA. Sedentary behavior was defined as  $<100 \text{ counts} \cdot \text{min}^{-1}$  and light intensity activity as 101–1,951  $\text{counts} \cdot \text{min}^{-1}$ . The cutoff for sedentary behavior is an arbitrary threshold, which we have used previously (25). We also calculated the average number of 5- and 10-min bouts of sustained physical activity at the MVPA level. In these analyses we allowed 1 min to drop below the threshold for MVPA in each 5-min bout. We calculated the percentage of participants accumulating 30 min or more per day at MVPA according to the recommendations from the Centers for Disease Control and Prevention and the American College of Sports Medicine (26). Data reduction, cleaning, and analyses of accelerometer data were performed using a specially written program (MAHUFFe; see [www.mrc-epid.cam.ac.uk](http://www.mrc-epid.cam.ac.uk)).

### Statistics

Descriptive summary statistics were calculated using means  $\pm$  SD. Fasting insulin and triglycerides were logarithmically transformed owing to their skewed distribution. Geometric mean and reference intervals ( $1.96 \times \text{SD}$ ) are presented in the RESULTS.

We modeled the associations be-

Table 1—Descriptive characteristics of participants

|                                                       | Men              | Women            | P value by ANOVA |
|-------------------------------------------------------|------------------|------------------|------------------|
| n                                                     | 103              | 155              |                  |
| Age (years)                                           | 40.9 ± 6.4       | 40.7 ± 6.4       | NS               |
| Weight (kg)                                           | 90.4 ± 16.4      | 73.7 ± 14.4      | <0.0001          |
| Height (m)                                            | 1.78 ± 0.07      | 1.64 ± 0.06      | <0.0001          |
| BMI (kg/m <sup>2</sup> )                              | 28.4 ± 4.6       | 27.4 ± 5.1       | NS               |
| Fat mass (kg)                                         | 22.5 ± 9.4       | 26.6 ± 10.0      | 0.01             |
| FFM (kg)                                              | 67.9 ± 8.7       | 47.1 ± 6.2       | <0.0001          |
| Waist (cm)                                            | 101.4 ± 12.0     | 88.1 ± 11.8      | <0.0001          |
| Systolic blood pressure (mmHg)                        | 127.3 ± 11.2     | 120.8 ± 13.6     | <0.0001          |
| Diastolic blood pressure (mmHg)                       | 81.9 ± 8.8       | 76.2 ± 9.3       | <0.0001          |
| Fasting insulin (mmol · l <sup>-1</sup> )             | 55.7 (50.2–61.8) | 46.5 (43.4–49.8) | 0.02             |
| Fasting glucose (mmol · l <sup>-1</sup> )             | 5.10 ± 0.86      | 4.78 ± 0.52      | <0.0001          |
| Triglycerides (mmol · l <sup>-1</sup> )               | 1.45 (1.31–1.61) | 1.05 (0.98–1.11) | <0.0001          |
| HDL (mmol · l <sup>-1</sup> )                         | 1.22 ± 0.32      | 1.57 ± 0.38      | <0.0001          |
| VO <sub>2max</sub> (ml · FFM · min <sup>-1</sup> )    | 59.6 ± 11.1      | 57.8 ± 10.4      | NS               |
| Time sedentary (min · day <sup>-1</sup> )             | 442 ± 97         | 419 ± 77         | 0.03             |
| Time light (min · day <sup>-1</sup> )                 | 309 ± 80         | 320 ± 68         | NS               |
| Time moderate and vigorous (min · day <sup>-1</sup> ) | 30 ± 18          | 24 ± 16          | 0.003            |
| No. of 5-min bouts of MVPA                            | 0.9 ± 0.9        | 0.8 ± 0.9        | NS               |
| No. of 10-min bouts of MVPA                           | 0.3 ± 0.5        | 0.2 ± 0.4        | NS               |
| Total counts (× 1,000 · day <sup>-1</sup> )           | 283 ± 104        | 264 ± 98         | NS               |

Data are means ± SD or geometric mean (95% CI). n = 258.

tween all physical activity subcomponents (total counts, time spent sedentary, at light intensity activity, and at MVPA, and bouts of MVPA) and the phenotypes of the metabolic syndrome and clustered metabolic risk in separate models. These analyses were adjusted for age and sex. When obesity was not the outcome of interest, we assessed whether the subcomponents of physical activity were associated with each intermediary phenotype per se after adjustment for waist circumference, age, and sex. We then examined whether the different physical activity subcomponents were associated with clustered metabolic risk (zMS) in separate models. Finally, stepwise multiple linear regression analysis was used to examine which of the accelerometry-derived time estimates of physical activity variables contributed to the explained variation in clustered metabolic risk after adjustment for sex, age, and measurement time. We controlled for multicollinearity by calculating the correlation coefficients between the different time-derived variables and by calculating the tolerance and variance inflation factors. All data were analyzed in their continuous form although data are stratified by quartiles of total body movement (counts · day<sup>-1</sup>) for illustrative purposes. All analyses were conducted using SPSS for Windows (version 11; SPSS, Chicago, IL). *P* < 0.05 denotes statistical significance.

**RESULTS**— Table 1 shows the descriptive characteristics of study participants. Thirty-two percent of participants were classified as normal weight, 40% were overweight, and an additional 27% were obese. Age, weight, height, BMI, waist circumference, fat mass, FFM, VO<sub>2max</sub>, fasting HDL cholesterol, triglycerides, glucose, and the summary score of clustered metabolic risk did not differ significantly (all *P* > 0.15) between those included in this report (*n* = 258) and the rest of the study participants (*n* = 105). However, fasting insulin (log transformed) was slightly higher in those included in the present report (*P* = 0.041).

Sex differences were observed for most of the body composition and metabolic variables. Aerobic fitness and total body movement (total counts per day) were similar for men and women. However, they allocated their physical activity differently between the different time estimates of activity. Men spent significantly more time sedentary (*P* = 0.03) and at MVPA (*P* = 0.002) than women. Two-thirds (66.2%) of participants accumulated <30 min of MPVA per day according to the accelerometry measurements. Of participants, 61 and 25% did not record any single 10- or 5-min bouts, respectively, of MVPA during the measurement period.

Table 2 shows the separate associations (standardized β-coefficients) be-

tween accumulated time spent sedentary, at light intensity activity, and at MVPA and total body movement (counts · day<sup>-1</sup>), with the intermediary phenotypic metabolic risk factors and clustered metabolic risk. Because all outcomes are expressed in the same unit (SD), it is possible to directly compare the magnitude of associations between the different components of activity to each of the outcomes, assuming they are measured with the same degree of measurement error. Total body movement (counts · day<sup>-1</sup>) was significantly and independently associated with three (fasting insulin, triglycerides, and HDL cholesterol) of the six individual risk factors and with clustered metabolic risk. Time spent sedentary was marginally significantly associated with fasting insulin (*P* = 0.05). Time spent at light-intensity activity was inversely associated with fasting triglycerides (*P* = 0.03). Time spent at MVPA was significantly associated with fasting insulin (*P* = 0.02) and clustered metabolic risk (*P* = 0.03). As indicated by the β-coefficients, the magnitude of association between total body movement (counts · day<sup>-1</sup>) with clustered metabolic risk was about 25% stronger than that between MVPA and clustered risk. Bouts of PA were not significantly associated with any of the intermediary risk factors or with clustered metabolic risk (data not shown). Furthermore, substituting waist circumference

Table 2—Independent associations of patterns of physical activity from accelerometry and intermediary phenotypic risk factors and clustered metabolic risk in middle-aged adults with a family history of type 2 diabetes

| Outcome                                             | Sedentary             | P value | Light                   | P value | MVPA                    | P value | Total counts            | P value | Fitness                  | P value |
|-----------------------------------------------------|-----------------------|---------|-------------------------|---------|-------------------------|---------|-------------------------|---------|--------------------------|---------|
| Waist (cm)                                          | 0.04 (−0.07 to 0.14)  | 0.51    | 0.03 (−0.08 to 0.13)    | 0.63    | −0.10 (−0.21 to 0.01)   | 0.07    | −0.09 (−0.20 to 0.01)   | 0.09    | 0.005 (−0.003 to 0.013)  | 0.21    |
| Blood pressure                                      | 0.02 (−0.09 to 0.12)  | 0.77    | −0.02 (−0.12 to 0.09)   | 0.75    | −0.03 (−0.14 to 0.07)   | 0.53    | −0.03 (−0.14 to 0.08)   | 0.59    | −0.005 (−0.1 to 0.002)   | 0.17    |
| Insulin ( $\text{mol} \cdot \text{l}^{-1}$ )        | 0.10 (0.001–0.19)     | 0.049   | −0.06 (−0.18 to 0.07)   | 0.40    | −0.12 (−0.21 to −0.02)  | 0.02    | −0.14 (−0.23 to −0.04)  | 0.005   | −0.01 (−0.02 to −0.004)  | 0.003   |
| Glucose ( $\text{mmol} \cdot \text{l}^{-1}$ )       | −0.02 (−0.13 to 0.09) | 0.73    | 0.03 (−0.08 to 0.14)    | 0.60    | 0.05 (−0.06 to 0.16)    | 0.37    | 0.002 (−0.11 to 0.11)   | 0.97    | −0.003 (−0.01 to 0.005)  | 0.50    |
| Triglycerides ( $\text{mmol} \cdot \text{l}^{-1}$ ) | 0.08 (−0.04 to 0.20)  | 0.20    | −0.12 (−0.23 to −0.001) | 0.03    | −0.06 (−0.18 to 0.05)   | 0.27    | −0.12 (−0.23 to −0.003) | 0.04    | −0.004 (−0.01 to 0.004)  | 0.30    |
| Inverted HDL ( $\text{mmol} \cdot \text{l}^{-1}$ )  | 0.10 (−0.01 to 0.21)  | 0.08    | −0.06 (−0.17 to 0.05)   | 0.28    | −0.07 (−0.17 to 0.03)   | 0.17    | −0.11 (−0.20 to −0.001) | 0.03    | 0.002 (−0.005 to 0.009)  | 0.56    |
| Sum Z scores                                        | 0.07 (−0.01 to 0.14)  | 0.10    | −0.03 (−0.12 to 0.05)   | 0.40    | −0.09 (−0.17 to −0.008) | 0.03    | −0.12 (−0.20 to −0.04)  | 0.004   | −0.003 (−0.007 to 0.001) | 0.09    |

Data are standardized  $\beta$ -coefficients (95% CI).  $n = 258$ . Data on insulin and triglycerides are log transformed. Data are adjusted for sex and age. Data on total counts from accelerometry are additionally adjusted for monitoring time. All subcomponents except waist circumference are additionally adjusted for waist circumference.

with fat mass or BMI as a confounding variable did not change the results (data not shown). Similarly, when we excluded waist circumference for the clustered risk score and adjusted for waist circumference as a confounder, the results were unchanged (data not shown). We reexamined our data for the associations between total body movement with individual and clustered metabolic risk by further adjustment for aerobic fitness, and the results were unchanged (data not shown).

Finally, we examined which of the time estimates (i.e., time spent sedentary, at light-intensity activity, and at MVPA) contributed to the explained variance in clustered metabolic risk after adjusting for age, sex, and aerobic fitness. Time spent at MVPA (standardized  $\beta = -0.13$  [95% CI  $-0.17$  to  $-0.01$ ],  $P = 0.03$ ) and sex remained as significant explanatory variables in the final model (adjusted  $R^2 = 19.1\%$ ). Aerobic fitness was significantly and inversely associated with fasting insulin ( $P = 0.003$ ) but not with any of the other individual risk factors or with clustered metabolic risk (Table 2).

Figure 1 shows the associations between total body movement ( $\text{counts} \cdot \text{day}^{-1}$ ) and clustered metabolic risk. A significant inverse dose-response association was observed between quartiles of total activity with clustered metabolic risk ( $P$  for trend = 0.02).

**CONCLUSIONS**— We show here the cross-sectional associations between different subcomponents of objectively measured physical activity with intermediary phenotypic risk factors and clustered metabolic risk in a group of sedentary, middle-aged individuals with a family history of type 2 diabetes. Our results suggest that total body movement was significantly associated with insulin resistance, dyslipidemia, and clustered metabolic risk independent of sex, age, obesity, and aerobic fitness. Time spent at MVPA was weakly associated with clustered risk, whereas bouts of MVPA and accumulated time spent sedentary and at light-intensity activity were unrelated to clustered risk. Promoting overall body movement and an increase in everyday total physical activity may therefore have beneficial effects on metabolic risk factors in overweight, sedentary adults.

There are several limitations that need to be considered when interpreting the findings from this study. First, this is a cross-sectional study, limiting inferences of causality and its direction. Although we

controlled for several potential confounding factors (sex, age, aerobic fitness, and obesity), it is possible that other unmeasured confounders, such as genetic variation, socioeconomic variables, and early life programming, could explain our findings. Second, our results may be restricted to sedentary, overweight, middle-aged, Caucasian individuals with a family history of type 2 diabetes. However, given the epidemic increase in overweight and obesity (3) and the large proportion of adults who are not sufficiently active (27), it is likely that our results are generalizable to a large part of the general population. Third, the low frequency of individuals participating in vigorous-intensity physical activity may reduce the power to observe associations between time spent at this intensity level and metabolic risk.

This study also has unique strengths. We reduced the potential for recall bias and differential measurement error, which is an unavoidable component of self-reported physical activity, by measuring the total volume and other subcomponents of activity with accelerometry. These methods have been extensively validated in the laboratory and during free-living conditions (24,28–30). Aerobic fitness was derived from a submaximal exercise test. This measure is less precise than a true maximal exercise test. However, it is unlikely that this fact will bias the results of the present study, as the error in predicted maximal heat rate is likely to be random across the cohort. It is therefore also unlikely that the observed associations between activity variables, aerobic fitness, and metabolic outcomes are due to chance, bias, or measurement error.

The association between total body movement and clustered metabolic risk was ~25% stronger than the association between time spent at MVPA and clustered risk. This result supports the argument that all body movements that contribute to elevated energy expenditure contribute to a favorable metabolic risk profile. This observation is important when one is translating epidemiological findings into preventive action. Thus, although structured exercise and moderate to vigorous activity contribute to the prevention of cardiovascular and metabolic disease risk, particularly among those at high risk (31), an exclusive focus on increasing vigorous activity and structured exercise could have counterintuitive consequences, especially in populations who



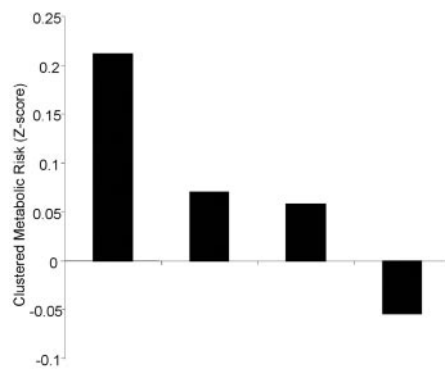

**Figure 1**—Clustered metabolic risk score stratified by quartiles of the total amount of activity ( $\text{counts} \cdot \text{day}^{-1} \times 1,000$ ) by accelerometry in sedentary, overweight, middle-aged men and women at high risk of developing diabetes ( $n = 258$ ). Data are adjusted for sex, age, and monitoring time ( $P$  for trend = 0.02).

find these activities unattractive and these targets hard to reach. Our results corroborate our previous findings suggesting that higher levels of PAEE measured by individual calibrated heart rate monitoring are favorably associated with features of the metabolic syndrome (15,16).

Study participants recorded, on average, fewer than one 5-min bout of MVPA per day, and bouts of MVPA were not associated with any of the intermediary phenotypic risk factors. It may be that the accumulated time at MVPA and particularly total body movement is more important in relation to these risk factors in sedentary individuals. However, we cannot exclude the possibility that bouts of activity are more strongly associated with intermediary phenotypic risk factors in a more heterogeneous population. Our data also suggest a linear dose-response association between the total amount of activity with clustered metabolic risk. Thus, sedentary individuals may benefit from accumulating physical activity throughout the day or in shorter bouts (i.e., <5 min), and more activity accumulated leads to greater metabolic health benefits.

Previous epidemiological studies have clearly demonstrated that self-reported physical activity predicts cardiovascular morbidity and mortality end points (32–34) and that both walking and vigorous exercise are associated with risk reduction in the incidence of cardiovascular events (35–37). Further, both physical activity and obesity are independent predictors of all-cause mortality (38). However, these studies have not been able to characterize minute-by-minute pat-

terns of physical activity because of reliance on self-reported measures of activity and lack of controls for aerobic fitness. From a public health perspective, this fact is important because if the association between physical activity and CVD and metabolic risk factors is mediated through aerobic fitness, it is likely that more vigorous exercise is needed to prevent CVD morbidity and mortality. Individual and population-based interventions would need to reflect this possibility.

In summary, total body movement is associated with intermediary phenotypic risk factors for CVD and metabolic disease and with clustered metabolic risk independent of aerobic fitness and obesity. Increasing the total amount of physical activity in sedentary and overweight individuals may have beneficial effects on these metabolic risk factors.

**Acknowledgments**—We thank the Medical Research Council, National Health Service R&D, Royal College of General Practitioners Scientific Foundation, and Diabetes U.K., which funded the development and execution of the ProActive trial.

We thank Jian'an Luan for statistical advice, Mark Hennings for helping develop the MAHUFFe software, the study participants, the practice teams for their collaboration and work in helping with recruitment, and the trial coordination, measurement, and intervention teams.

The ProActive research team includes, besides the authors, Kate Williams, Julie Grant, Tom Fanshawe, A. Toby Prevost (principal investigator), Wendy Hardeman (principal investigator), William Hollingworth, David Spiegelhalter (principal investigator), Stephen Sutton (principal investigator), and Ann Louise Kinmonth (principal investigator).

## References

1. Laaksonen DE, Lakka HM, Niskanen LK, Kaplan GA, Salonen JT, Lakka TA: Metabolic syndrome and development of diabetes mellitus: application and validation of recently suggested definitions of the metabolic syndrome in a prospective cohort study. *Am J Epidemiol* 156:1070–1077, 2002
2. Katzmarzyk P, Church TS, Blair SN: Cardiorespiratory fitness attenuates the effects of the metabolic syndrome on all-cause and cardiovascular disease mortality in men. *Arch Intern Med* 164:10926–1097, 2004
3. Mokdad AH, Ford ES, Bowman BA, Dietz WH, Vinicor F, Bales VS, Marks JS: Prevalence of obesity, diabetes, and obesity-related health risk factors, 2001. *JAMA* 289:76–79, 2003

4. Zimmet P, Alberti KG, Shaw J: Global and societal implications of the diabetes epidemic. *Nature* 414:782–787, 2001
5. Stumvoll M, Goldstein BJ, van Haften TW: Type 2 diabetes: principles of pathogenesis and therapy. *Lancet* 365:1333–1346, 2005
6. Eckel RH, Grundy SM, Zimmet PZ: The metabolic syndrome. *Lancet* 365:1415–1428, 2005
7. Wareham NJ, Rennie K: The assessment of physical activity in individuals and populations: why try to be more precise about how physical activity is assessed? *Int J Obes Relat Metab Disord* 22:S30–S38, 1998
8. Carroll S, Cooke CB, Butterly RJ: Metabolic clustering, physical activity and fitness in non-smoking, middle-aged men. *Med Sci Sports Exerc* 32:2079–2086, 2000
9. Fung TT, Hu FB, Yu J, Chu NF, Spiegelman D, Tofler GH, Willett WC, Rimm EB: Leisure-time physical activity, television watching, and plasma biomarkers of obesity and cardiovascular disease risk. *Am J Epidemiol* 152:1171–1178, 2000
10. Rainwater DL, Mitchell BD, Comuzzie AG, VandeBerg JL, Stern MP, MacCluer JW: Association among 5-year changes in weight, physical activity, and cardiovascular disease risk factors in Mexican Americans. *Am J Epidemiol* 152:974–982, 2000
11. Laaksonen DE, Lakka HM, Salonen JT, Niskanen LK, Rauramaa R, Lakka TA: Low levels of leisure-time physical activity and cardiorespiratory fitness predict development of the metabolic syndrome. *Diabetes Care* 25:1612–1618, 2002
12. Lakka TA, Laaksonen DE, Lakka HM, Männikö N, Niskanen LK, Rauramaa R, Salonen JT: Sedentary lifestyle, poor cardiorespiratory fitness, and the metabolic syndrome. *Med Sci Sports Exerc* 35:1279–1286, 2003
13. Jakes RW, Day NE, Khaw KT, Luben R, Oakes S, Welch A, Bingham S, Wareham NJ: Television viewing and low participation in vigorous recreation are independently associated with obesity and markers of cardiovascular disease risk: EPIC-Norfolk population-based study. *Eur J Clin Nutr* 57:1089–1096, 2003
14. O'Donovan G, Owen A, Kearney EM, Jones DW, Nevill AM, Woolf-May K, Bird SR: Cardiovascular disease risk factors in habitual exercisers, lean sedentary men and abdominally obese sedentary men. *Int J Obes Relat Metab Disord* 29:1063–1069, 2005
15. Franks PW, Ekelund U, Brage S, Wong MJ, Wareham NJ: Does the association of habitual physical activity with the metabolic syndrome differ by level of fitness? *Diabetes Care* 27:1187–1193, 2004
16. Ekelund U, Brage S, Franks PW, Hennings S, Emms S, Wareham NJ: Physical activity energy expenditure predicts pro-

- gression toward the metabolic syndrome independently of aerobic fitness in middle-aged healthy Caucasians: the Medical Research Council Ely Study. *Diabetes Care* 28:1195–2000, 2005
17. Williams K, Prevost AT, Griffin S, Harde-  
man W, Hollingworth W, Spiegelhalter  
D, Sutton S, Ekelund U, Wareham N,  
Kinmonth AL: The ProActive trial proto-  
col—a randomised controlled trial of the  
efficacy of a family-based, domiciliary in-  
tervention programme to increase physi-  
cal activity among individuals at high risk  
of diabetes. *BMC Public Health* 4:48, 2004
18. Wareham NJ, Jakes RW, Rennie KL,  
Schuit J, Mitchell S, Hennings S, Day NE:  
Validity and repeatability of a simple in-  
dex derived from the short physical activ-  
ity questionnaire used in the European  
Prospective Investigation into Cancer and  
Nutrition (EPIC) study. *Public Health Nutr*  
6:407–413, 2003
19. Godin G, Shephard RJ: A simple method  
to assess exercise behavior in the commu-  
nity. *Can J Appl Sport Sci* 10:141–146,  
1985
20. Simpson JA, Lobo DN, Anderson JA, Mac-  
donald IA, Perkins AC, Neal KR, Allison  
SP, Rowlands BJ: Body water compart-  
ment measurements: a comparison of bio-  
electrical impedance analysis with tritium  
and sodium bromide dilution techniques.  
*Clin Nutr* 20:339–343, 2001
21. Shanholtzer BA, Patterson SM: Use of bio-  
electrical impedance in hydration status  
assessment: reliability of a new tool in  
psychophysiology research. *Int J Psycho-  
physiol* 49:217–226, 2003
22. Sun SS, Chumlea WC, Heymsfield SB,  
Lukaski HC, Schoeller D, Friedl K, Kucz-  
marski RJ, Flegal KM, Johnson CL, Hub-  
bard VS: Development of bioelectrical  
impedance analysis prediction equations  
for body composition with the use of a  
multicomponent model for use in epi-  
demiologic surveys. *Am J Clin Nutr* 77:331–  
340, 2003
23. Armstrong BK, White E, Saracci R. *Princi-  
ples of Exposure Measurement in Epidemi-  
ology*. Oxford, U.K., Oxford University  
Press, 1994
24. Freedson PS, Melanson E, Sirard J: Cali-  
bration of the Computer Science and Ap-  
plications, Inc. accelerometer. *Med Sci  
Sports Exerc* 30:777–781, 1998
25. Ekelund U, Åman J, Yngve A, Renman C,  
Westertorp K, Sjöström M: Physical activ-  
ity but not energy expenditure is reduced  
in obese adolescents: a case-control study.  
*Am J Clin Nutr* 76:935–941, 2002
26. Pate RR, Pratt M, Blair SN, Haskell WL,  
Macera CA, Bouchard C, Buchner D, Et-  
tinger W, Heath GW, King AC, et al:  
Physical activity and public health: a rec-  
ommendation from the Centers for Dis-  
ease Control and Prevention and the  
American College of Sports Medicine.  
*JAMA* 273:402–407, 1995
27. *At Least Five a Week: Evidence on the Impact  
of Physical Activity and Its Relationship to  
Health: A Report from the Chief Medical Of-  
ficer*. London, Department of Health,  
2004
28. Brage S, Wedderkopp N, Franks PW,  
Andersen LB, Froberg K: Re-examination  
of validity and reliability of the CSA activ-  
ity monitor during walking and running.  
*Med Sci Sports Exerc* 35:1447–1454, 2003
29. Ekelund U, Åman J, Westertorp K: Is the  
ArteACC index a valid indicator of free-  
living physical activity in adolescents?  
*Obes Res* 11:793–801, 2003
30. Ekelund U, Sjöström M, Yngve A, Poortv-  
liet E, Nilsson A, Froberg K, Wedderkopp  
N, Westertorp K: Physical activity as-  
sessed by activity monitor and doubly la-  
beled water in children. *Med Sci Sports  
Exerc* 33:275–281, 2001
31. Toumletho J, Lindström J, Eriksson JE,  
Valle TT, Hämäläinen H, Ilanne-Parrika  
P, Keinänen-Kiukaanniemi S, Laakso M,  
Louheranta A, Rastas M, Salminen V,  
Uusitupa M, the Finnish Diabetes Preven-  
tion Study Group: Prevention of type 2  
diabetes mellitus by changes in lifestyle  
among subjects with impaired glucose in-  
tolerance. *N Engl J Med* 344:1343–1350,  
2001
32. Berlin JA, Colditz GA: A meta-analysis of  
physical activity in the prevention of cor-  
onary heart disease. *Am J Epidemiol* 132:  
612–628, 1990
33. Lee IM, Paffenbarger RS Jr, Hennekens  
CH: Physical activity, physical fitness and  
longevity. *Aging* 9:2–11, 1997
34. Barengo NC, Hu G, Lakka TA, Pekkarinen  
H, Nissinen A, Tuomilehto J: Low physi-  
cal activity as a predictor for total and  
cardiovascular disease mortality in mid-  
dle-aged men and women in Finland. *Eur  
Heart J* 25:2204–2211, 2004
35. Hakim AA, Petrovitch H, Burchfiel CM,  
Ross GW, Rodriguez BL, White LR, Yano  
K, Curb JD, Abbott RD: Effects of walking  
on mortality among non-smoking retired  
men. *N Engl J Med* 338:94–99, 1998
36. Manson JE, Greenland P, LaCroix AZ, Ste-  
fanick ML, Mouton CP, Oberman A, Perri  
MG, Sheps DS, Pettinger MB, Siscovick  
DS: Walking compared with vigorous ex-  
ercise for the prevention of cardiovascular  
events in women. *N Engl J Med* 347:716–  
725, 2002
37. Lee IM, Rexrode KM, Cook NR, Manson  
JE, Buring JE: Physical activity and coro-  
nary heart disease in women: is “no pain,  
no gain” passe? *JAMA* 285:1447–1454,  
2001
38. Hu FB, Willett WC, Li T, Stampfer MJ,  
Colditz GA, Manson JE: Adiposity as  
compared with physical activity in pre-  
dicting mortality among women. *N Engl  
J Med* 351:2694–703, 2004
